# Supplementary material for: NIR-II-responsive AuNRs@SiO2–RB@MnO2nanotheranostic for multimodal imaging-guided CDT/PTT synergistic cancer therapy
Source: Royal Society of Chemistry journal article supplement (doi:10.1039/d1tb02807c), 2022-01-01
Supplement: d1tb02807c1.pdf [file d1tb02807c1.pdf]

## Supporting Information

### **NIR-II-responsive AuNRs@SiO<sub>2</sub>-RB@MnO<sub>2</sub> nanotheranostic for multimode imaging-guided CDT/PTT synergistic cancer therapy**

Changchun Wen<sup>‡</sup>, Xiaolu Guo<sup>‡</sup>, Cunji Gao, Zhongkai Zhu, Nianqi Meng, Xing-Can Shen and Hong Liang<sup>\*</sup>

State Key Laboratory for Chemistry and Molecular Engineering of Medicinal Resources, School of Chemistry and Pharmacy Sciences, Guangxi Normal University, Guilin, 541004, P. R. China

E-mail: hliang@mailbox.gxnu.edu.cn

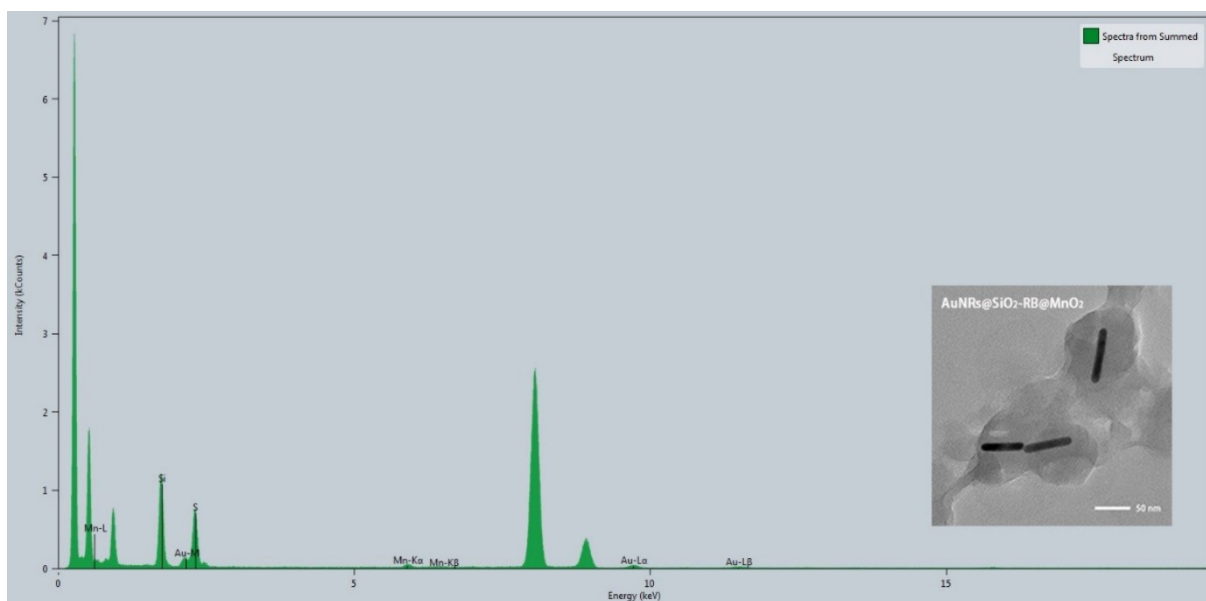

**Figure S1.** The energy dispersive spectroscopy (EDS) of AuNRs@SiO<sub>2</sub>-RB@MnO<sub>2</sub>.

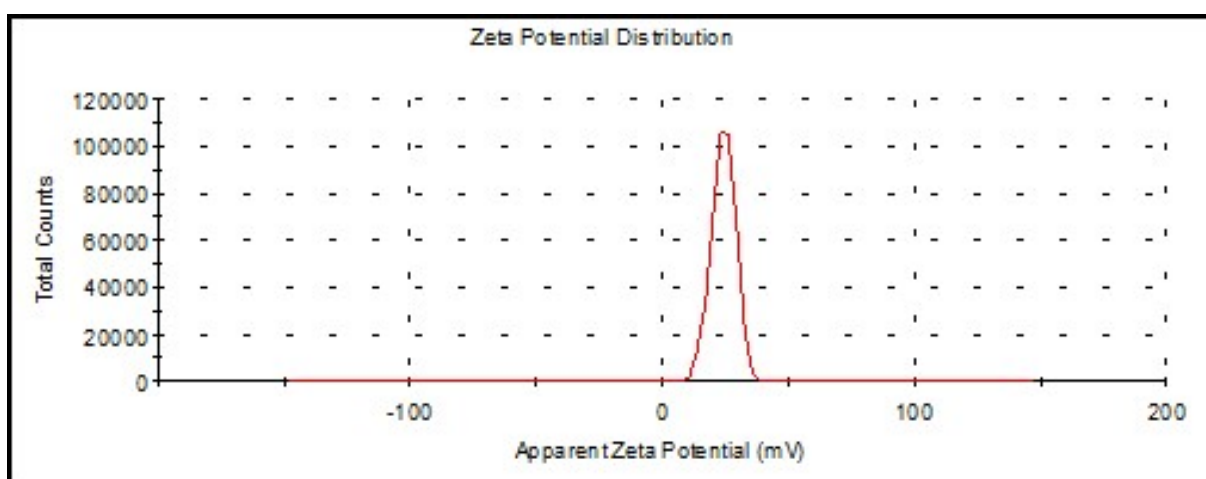

**Figure S2.** Zeta potentials of the AuNRs@SiO<sub>2</sub>-RB@MnO<sub>2</sub>.

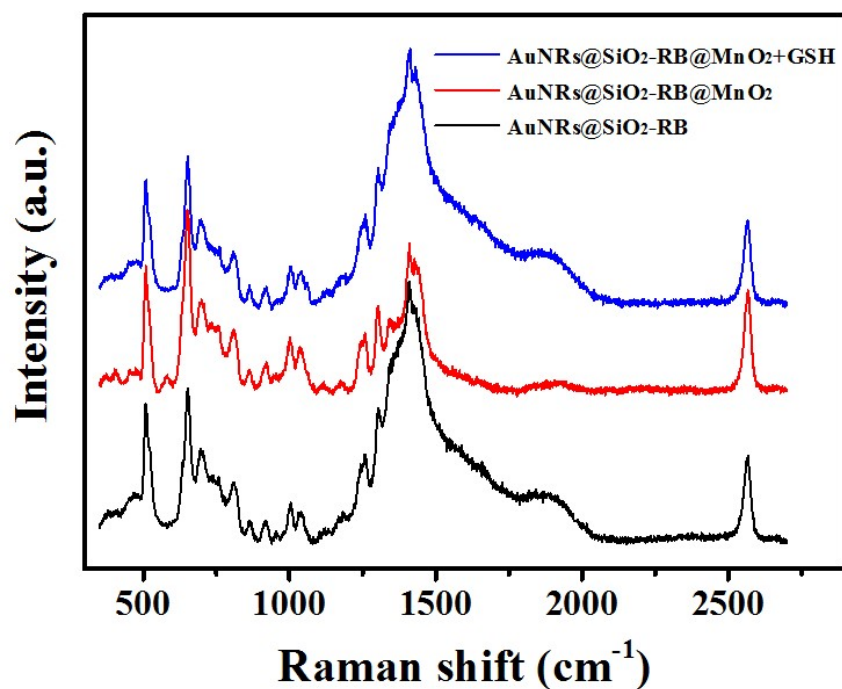

**Figure S3.** Raman spectra of AuNRs@SiO<sub>2</sub>-RB, AuNRs@SiO<sub>2</sub>-RB@MnO<sub>2</sub> and AuNRs@SiO<sub>2</sub>-RB@MnO<sub>2</sub>+GSH.

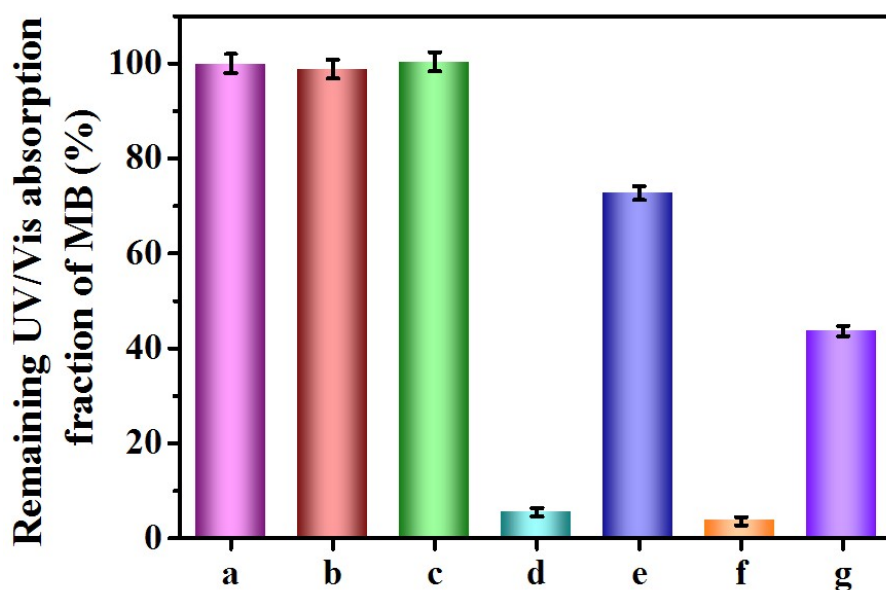

**Figure S4.** Bar plot showing the remaining percent of MB after different treatments: (a) untreated, (b) AuNRs@SiO<sub>2</sub>-RB@MnO<sub>2</sub> + H<sub>2</sub>O<sub>2</sub>, (c) 1 mM GSH + H<sub>2</sub>O<sub>2</sub>, (d) Mn<sup>2+</sup> + H<sub>2</sub>O<sub>2</sub>, (e) AuNRs@SiO<sub>2</sub>-RB@MnO<sub>2</sub> NPs + H<sub>2</sub>O<sub>2</sub> + 0.5 mM GSH, (f) AuNRs@SiO<sub>2</sub>-RB@MnO<sub>2</sub> NPs + H<sub>2</sub>O<sub>2</sub> + 1 mM GSH, (g) AuNRs@SiO<sub>2</sub>-RB@MnO<sub>2</sub> NPs + H<sub>2</sub>O<sub>2</sub> + 5 mM GSH. Reaction buffer: 25 mM NaHCO<sub>3</sub>, 10 mM H<sub>2</sub>O<sub>2</sub>, 0.5 mM MnCl<sub>2</sub>.

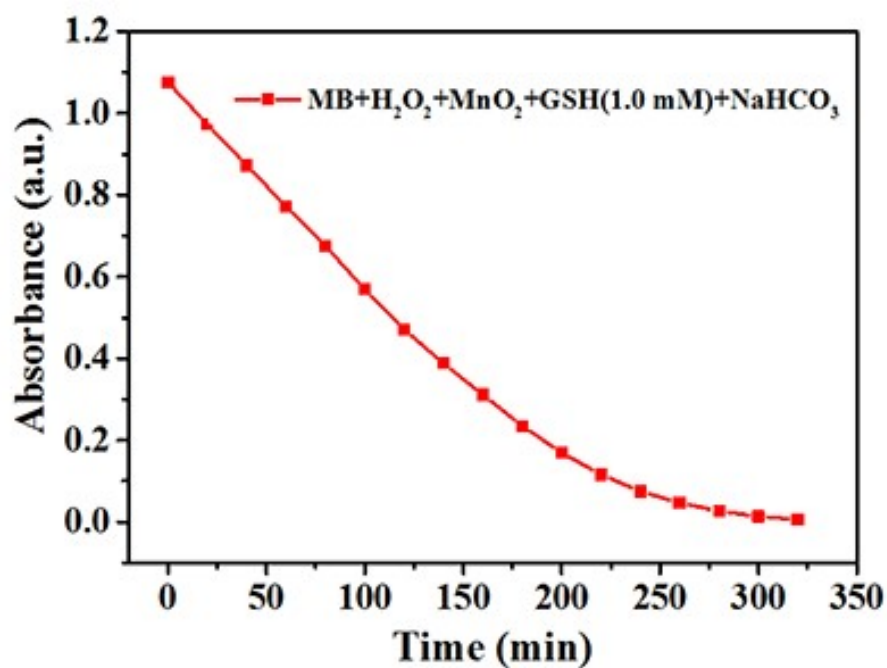

**Figure S5.** UV/Vis absorption intensity change curve at 665 nm of MB degradation by H<sub>2</sub>O<sub>2</sub> plus GSH-treated AuNRs@SiO<sub>2</sub>-RB@MnO<sub>2</sub> (simplified as MnO<sub>2</sub>) with different time.

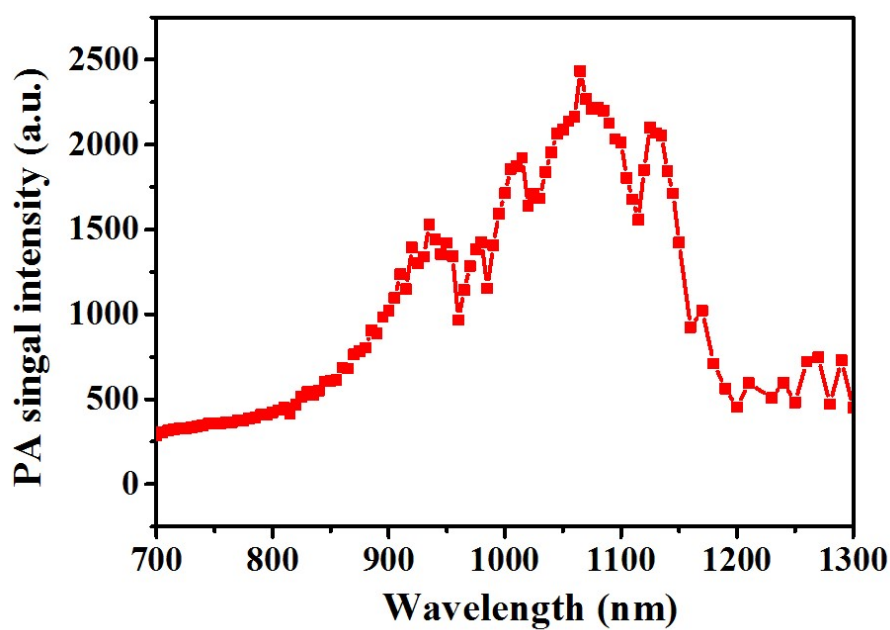

**Figure S6.** Photoacoustic spectra of 50 µg·mL<sup>-1</sup> AuNRs@SiO<sub>2</sub>-RB@MnO<sub>2</sub>.

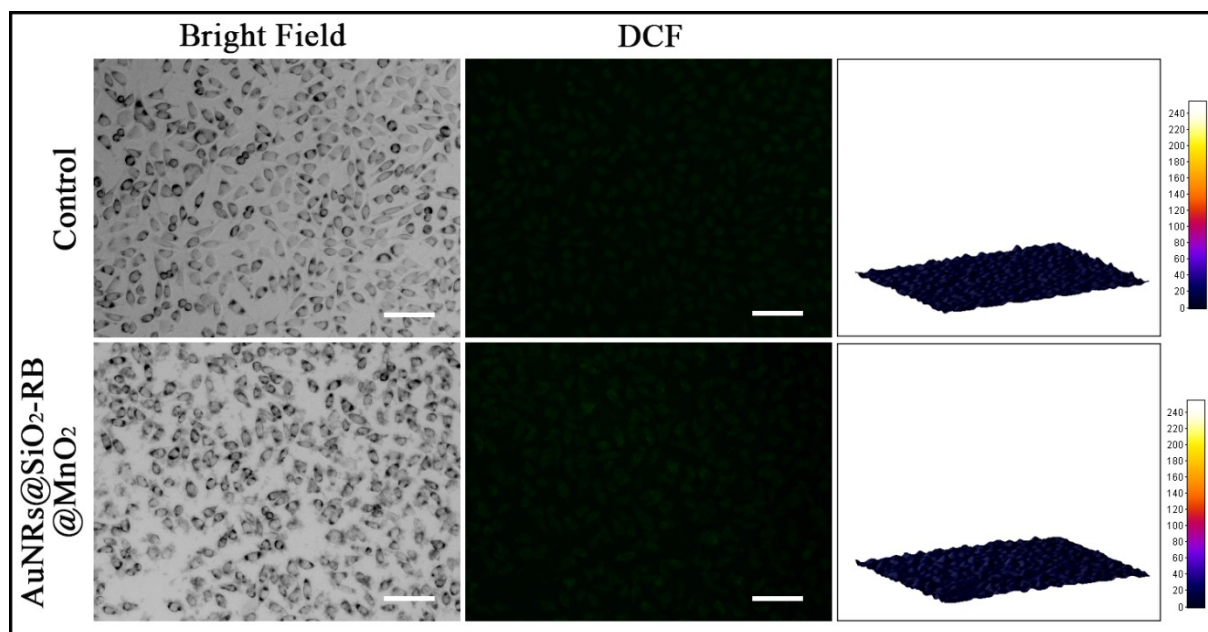

**Figure S7.** Bright-field and fluorescence images of ROS generation in L929 cells after treated by culture medium included AuNRs@SiO<sub>2</sub>-RB@MnO<sub>2</sub> for 6h. The green intracellular fluorescence originated from the DCF (the oxidation product of DCFH-DA). Scale bars:100  $\mu$ m.

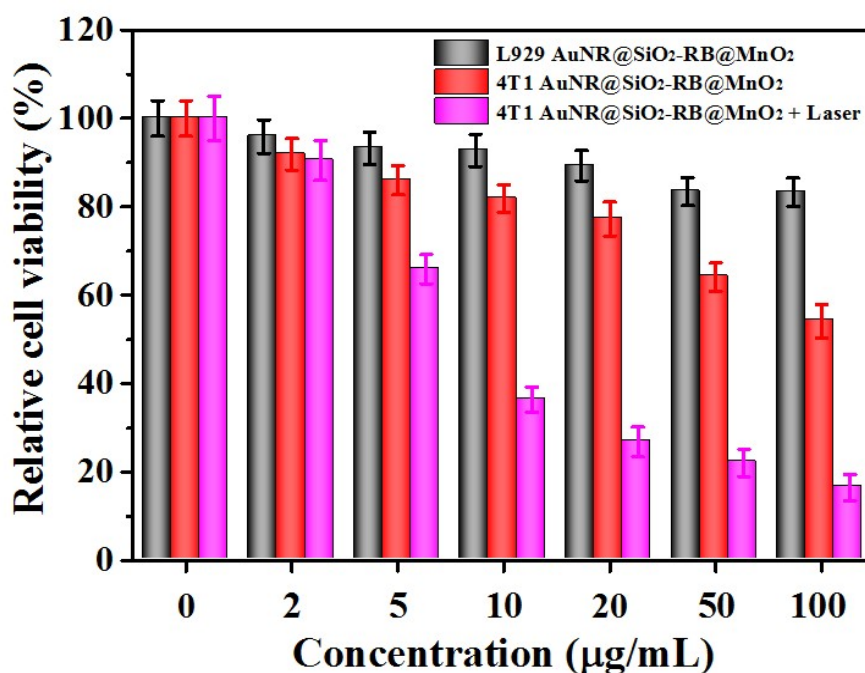

**Figure S8.** In vitro dark cytotoxicity and photoinduced cell killing from various AuNRs@SiO<sub>2</sub>-RB@MnO<sub>2</sub> concentrations from 0 to 100  $\mu$ g·mL<sup>-1</sup> of Au, respectively. The irradiation was carried out using the 1064 nm laser (1.0 W·cm<sup>-2</sup>, 10 min).

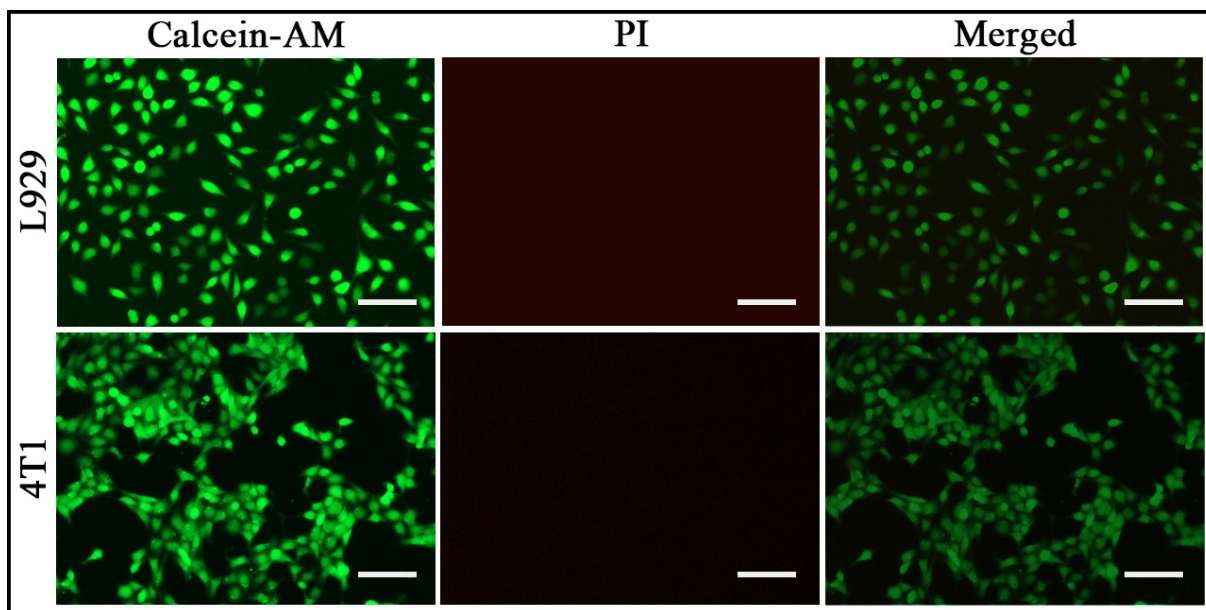

**Figure S9.** Calcein-AM/PI double staining of L929/4T1 cells subjected to treatments without the AuNRs@SiO<sub>2</sub>-RB@MnO<sub>2</sub>. Scale bars:100 μm.

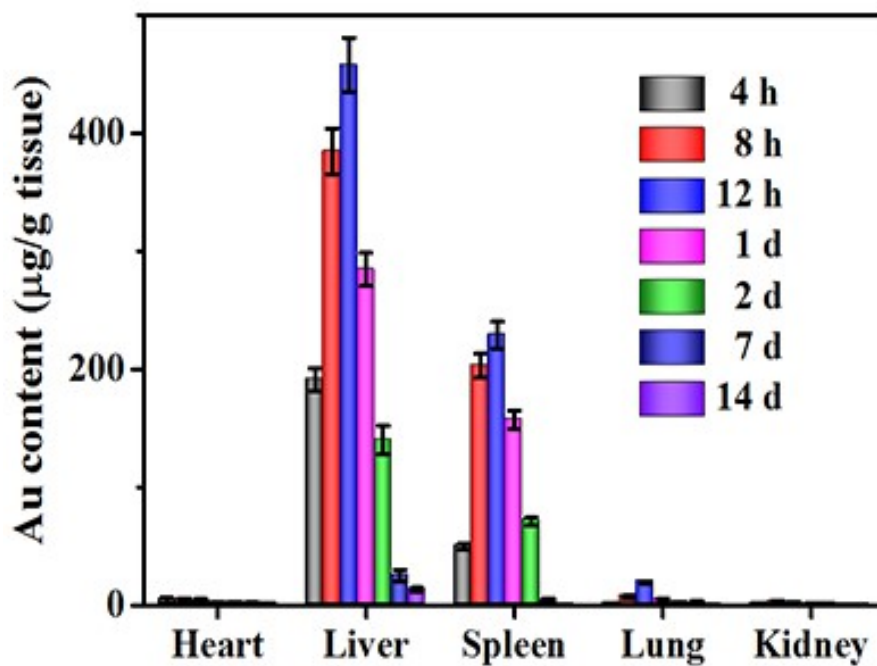

**Figure S10.** Biological distribution of AuNRs@SiO<sub>2</sub>-RB@MnO<sub>2</sub> in main organs of mice at different time after injection.

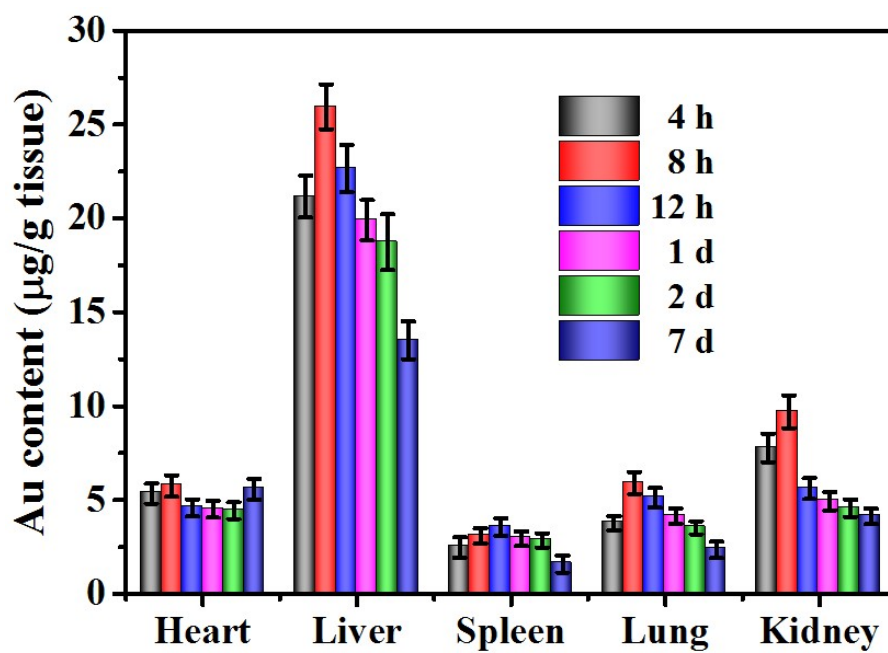

**Figure S11.** Biodistribution of Mn at different time points in main organs tissue of Balb/c mice after injection administration of  $[\text{Mn}^{2+}]$  ( $100 \mu\text{L}$ ,  $0.2 \text{ mg mL}^{-1}$ ).
